# Supplementary material for: Ontogeny of RORγt+ cells in the intestine of newborns and its role in the development of experimental necrotizing enterocolitis
Source: PubMed Central journal article supplement (PMC8725364; doi:10.1186/s13578-021-00739-6), 2022-01-04
Supplement: 13578_2021_739_MOESM1_ESM.pdf [file 13578_2021_739_MOESM1_ESM.pdf]

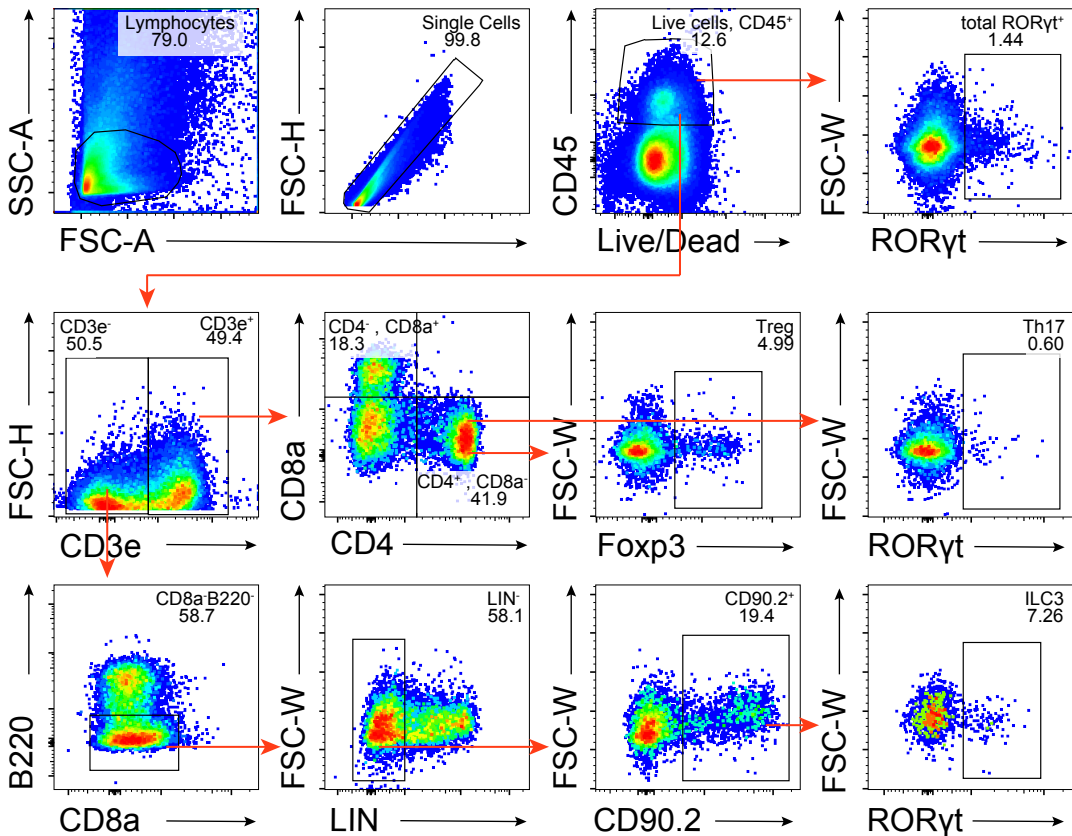

LIN: CD11b, CD11c
